# Supplementary material for: GPAT Gene Silencing in Muscle Reduces Diacylglycerols Content and Improves Insulin Action in Diet-Induced Insulin Resistance
Source: PubMed Central journal article supplement (PMC7583033; doi:10.3390/ijms21197369), 2020-10-06
Supplement: ijms-21-07369-s001.pdf [file ijms-21-07369-s001.pdf]

## Supplementary Materials

**Table S1.** Individual plasma free fatty acids concentration in mice fed control and high-fat diet.

|                | C14:0                   | C16:0                    | C16:1     | C18:0                   | C18:1                    | C18:2                    | C20:0                  | C20:2     | C20:4                   | C22:0                   | C22:6                  | C24:0                  | C24:1                  |
|----------------|-------------------------|--------------------------|-----------|-------------------------|--------------------------|--------------------------|------------------------|-----------|-------------------------|-------------------------|------------------------|------------------------|------------------------|
| <b>Control</b> | 7.08±1.46               | 70.66±8.03               | 5.99±1.39 | 30.02±2.39              | 69.23±7.29               | 61.29±11.03              | 1.09±0.20              | 2.32±0.37 | 9.57±1.44               | 3.90±0.31               | 1.67±0.20              | 4.04±1.04              | 0.16±0.02              |
| <b>HFD</b>     | 16.81±1.09 <sup>a</sup> | 95.14±10.59 <sup>a</sup> | 5.27±0.39 | 60.99±3.99 <sup>a</sup> | 141.35±8.55 <sup>a</sup> | 137.72±6.58 <sup>a</sup> | 3.97±0.30 <sup>a</sup> | 2.52±0.27 | 19.58±1.00 <sup>a</sup> | 11.19±0.69 <sup>a</sup> | 2.19±0.17 <sup>a</sup> | 8.14±0.64 <sup>a</sup> | 0.36±0.06 <sup>a</sup> |

Values are mean  $\mu\text{mol/l}$  of plasma  $\pm$  SD;  $n = 8$  per group;  $a - p < 0.05$  vs Control

**Table S2.** Impact of GPAT gene silencing on the content of individual acyl-CoA's in mouse gastrocnemius muscle.

|                   | <b>C2:0</b>              | <b>C3:0</b>               | <b>C4:0</b>                | <b>C14:0</b>             | <b>C16:0</b>             | <b>C16:1</b>             |
|-------------------|--------------------------|---------------------------|----------------------------|--------------------------|--------------------------|--------------------------|
| <b>Control</b>    | 1.15±0.17                | 16.59±2.26                | 0.016±0.004                | 0.12±0.01                | 0.85±0.10                | 0.64±0.06                |
| <b>HFD(+GPAT)</b> | 1.69±0.25 <sup>a</sup>   | 33.14±5.34 <sup>a</sup>   | 0.028±0.003 <sup>a</sup>   | 0.20±0.02 <sup>a</sup>   | 0.99±0.13 <sup>a</sup>   | 0.68±0.07                |
| <b>HFD(-GPAT)</b> | 2.18±0.19 <sup>a,b</sup> | 22.20±2.68 <sup>a,b</sup> | 0.040±0.006 <sup>a,b</sup> | 0.26±0.03 <sup>a,b</sup> | 1.15±0.10 <sup>a,b</sup> | 0.79±0.04 <sup>a,b</sup> |

  

|  | <b>C18:0</b>             | <b>C18:1</b>             | <b>C18:2</b>             | <b>C20:0</b>               | <b>C22:0</b>               | <b>C24:0</b>               | <b>C24:1</b>             |
|--|--------------------------|--------------------------|--------------------------|----------------------------|----------------------------|----------------------------|--------------------------|
|  | 0.73±0.09                | 2.59±0.33                | 1.54±0.18                | 0.017±0.003                | 0.022±0.004                | 0.028±0.004                | 0.013±0.002              |
|  | 1.20±0.15 <sup>a</sup>   | 2.80±0.34                | 1.96±0.27 <sup>a</sup>   | 0.019±0.004                | 0.033±0.005 <sup>a</sup>   | 0.031±0.005                | 0.009±0.001              |
|  | 1.73±0.09 <sup>a,b</sup> | 3.37±0.38 <sup>a,b</sup> | 2.91±0.34 <sup>a,b</sup> | 0.028±0.004 <sup>a,b</sup> | 0.039±0.008 <sup>a,b</sup> | 0.039±0.007 <sup>a,b</sup> | 0.012±0.001 <sup>b</sup> |

Values are mean pmol/mg of tissue ± SD; *n* = 8 per group; a – *p* < 0.05 vs Control; b – *p* < 0.05 vs HFD(+GPAT).

**Table S3.** Impact of GPAT gene silencing on the level of individual short-chain acyl-carnitines in mouse gastrocnemius muscle.

|                              | C2                      | C3                     | C4                     | C5                     | C5DC                      | C6                     | C8                     | C10                    | C12                      |
|------------------------------|-------------------------|------------------------|------------------------|------------------------|---------------------------|------------------------|------------------------|------------------------|--------------------------|
| <b>Control</b>               | 48.14±5.39              | 3.16±0.34              | 3.82±0.48              | 2.41±0.33              | 0.015±0.0024              | 0.79±0.09              | 0.24±0.05              | 0.17±0.03              | 0.26±0.02                |
| <b>HFD<sub>(+GPAT)</sub></b> | 55.04±6.19 <sup>a</sup> | 3.80±0.40 <sup>a</sup> | 4.42±0.46 <sup>a</sup> | 2.80±0.37 <sup>a</sup> | 0.018±0.0020 <sup>a</sup> | 0.95±0.16 <sup>a</sup> | 0.28±0.03 <sup>a</sup> | 0.21±0.04 <sup>a</sup> | 0.31±0.03 <sup>a</sup>   |
| <b>HFD<sub>(-GPAT)</sub></b> | 45.44±5.21 <sup>b</sup> | 3.42±0.24 <sup>b</sup> | 3.63±0.27 <sup>b</sup> | 2.31±0.40 <sup>b</sup> | 0.016±0.0022              | 0.81±0.11 <sup>b</sup> | 0.21±0.03 <sup>b</sup> | 0.17±0.04              | 0.23±0.03 <sup>a,b</sup> |

Values are mean pmol/mg of tissue ± SD; *n* = 8 per group; a – *p* < 0.05 vs Control; b – *p* < 0.05 vs HFD<sub>(+GPAT)</sub>.

**Table S4.** Impact of GPAT gene silencing on the level of individual long-chain acyl-carnitines in mouse gastrocnemius muscle.

|                              | <b>C14</b>             | <b>C16</b>               | <b>C18</b>               | <b>C18:1</b>             |
|------------------------------|------------------------|--------------------------|--------------------------|--------------------------|
| <b>Control</b>               | 1.47±0.20              | 2.46±0.24                | 0.72±0.10                | 6.94±0.59                |
| <b>HFD<sub>(+GPAT)</sub></b> | 1.19±0.18 <sup>a</sup> | 2.93±0.33 <sup>a</sup>   | 1.23±0.14 <sup>a</sup>   | 7.31±0.51                |
| <b>HFD<sub>(-GPAT)</sub></b> | 1.28±0.20              | 3.33±0.37 <sup>a,b</sup> | 1.36±0.07 <sup>a,b</sup> | 8.40±0.47 <sup>a,b</sup> |

Values are mean pmol/mg of tissue ± SD; *n* = 8 per group; a – *p* < 0.05 vs Control; b – *p* < 0.05 vs HFD<sub>(+GPAT)</sub>.

**Table S5.** The impact of GPAT silencing on the content of ceramide molecular species in mouse gastrocnemius muscle.

|                              | d18:1/C14:0                | d18:1/C16:0            | d18:1/C18:0             | d18:1/C18:1            | d18:1/C20:0            | d18:1/C22:0            | d18:1/C24:0            | d18:1/C24:1            |
|------------------------------|----------------------------|------------------------|-------------------------|------------------------|------------------------|------------------------|------------------------|------------------------|
| <b>Control</b>               | 0.029±0.003                | 1.94±0.24              | 16.93±1.53              | 0.56±0.09              | 0.27±0.04              | 0.77±0.13              | 1.24±0.16              | 3.83±0.44              |
| <b>HFD<sub>(+GPAT)</sub></b> | 0.034±0.008                | 3.20±0.35 <sup>a</sup> | 30.27±3.42 <sup>a</sup> | 0.67±0.05 <sup>a</sup> | 0.57±0.10 <sup>a</sup> | 1.45±0.21 <sup>a</sup> | 2.55±0.32 <sup>a</sup> | 5.08±0.59 <sup>a</sup> |
| <b>HFD<sub>(-GPAT)</sub></b> | 0.041±0.004 <sup>a,b</sup> | 3.43±0.30 <sup>a</sup> | 32.62±4.15 <sup>a</sup> | 0.71±0.06 <sup>a</sup> | 0.66±0.13 <sup>a</sup> | 1.55±0.25 <sup>a</sup> | 2.68±0.19 <sup>a</sup> | 5.19±0.58 <sup>a</sup> |

Values are mean pmol/mg of tissue +/- SD; n=8 per group; a - p<0.05 vs Control; b - p<0.05 vs HFD<sub>(+GPAT)</sub>.
